# Supplementary material for: Polymer/copper nanocomplex-induced lysosomal cell death promotes tumor lymphocyte infiltration and synergizes anti-PD-L1 immunotherapy for triple-negative breast cancer
Source: Royal Society of Chemistry journal article supplement (doi:10.1039/d3bm00627a), 2023-01-01

# Raw western blot images

The corresponding blots used in the manuscript were circled with red or black rectangles

**Figure 3F**

The red box is targeted PARP

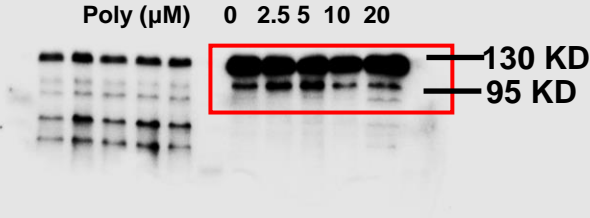

The red box is targeted β-actin

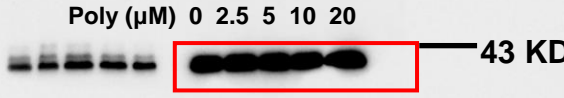

Figure 3G

Red box is Caspase-3

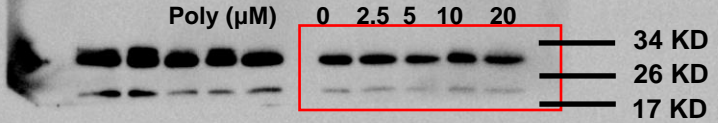

Red box is β-actin

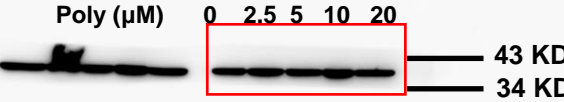

Figure 4A

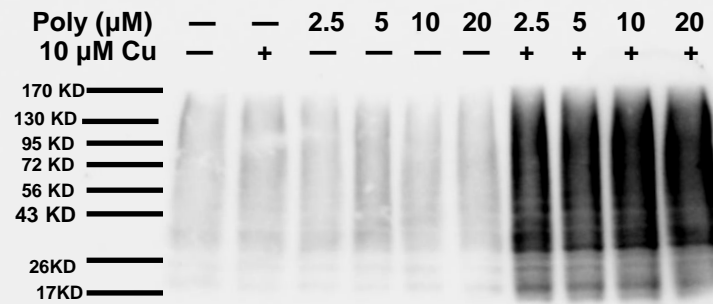

Poly-ubiquitin

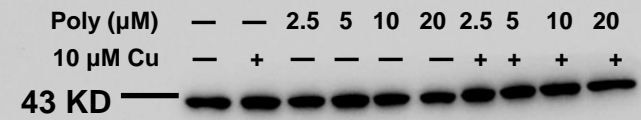

$\beta$ -actin

Figure 4F

The red box is targeted PD-L1

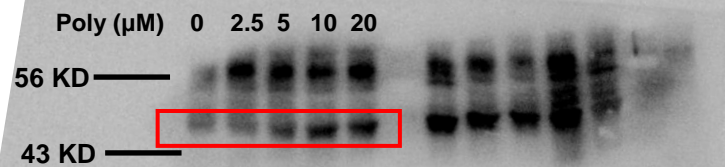

The red box is targeted  $\beta$ -actin

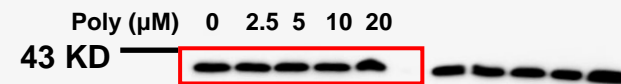

Figure 4G

Red box is targeted Poly-ubiquitin

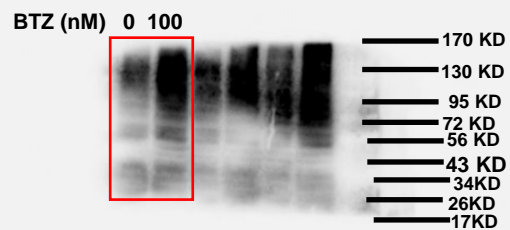

Red box is targeted  $\beta$ -actin

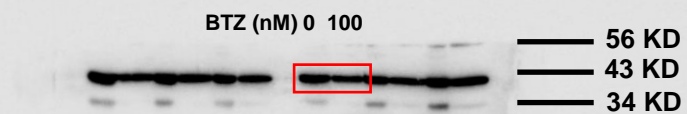

**Figure 4H**

**Red box is targeted PD-L1**

BTZ (nM) 0 100

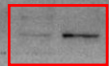

56 KD

43 KD

**Red box is targeted  $\beta$ -actin**

BTZ (nM) 0 100

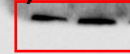

34 KD

43 KD



## Figure 5B and 5E

Red box is Figure 5B  $\beta$ -actin

Black box is Figure 5E  $\beta$ -actin

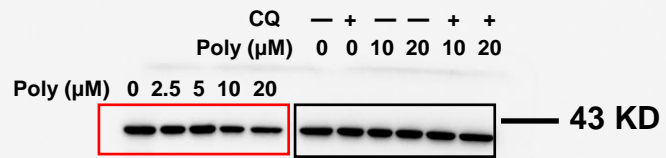

Red box is Figure 5B LC3B

Black box is Figure 5E LC3B

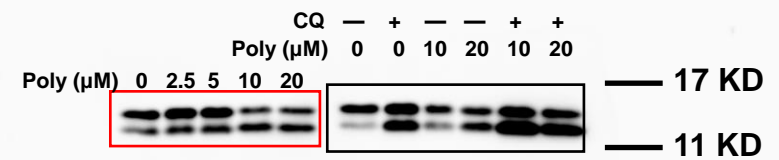



Figure 5C

Red box is targeted LC3B

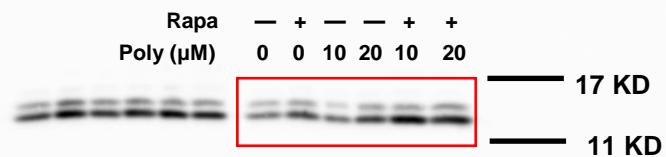

Red box is targeted  $\beta$ -actin

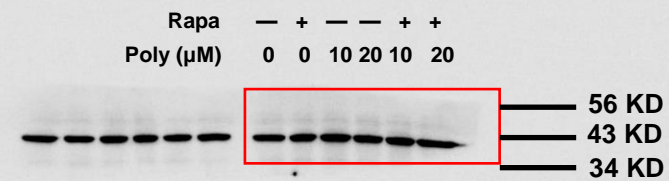

Figure 5 D

Red box is targeted Poly-ubiquitin

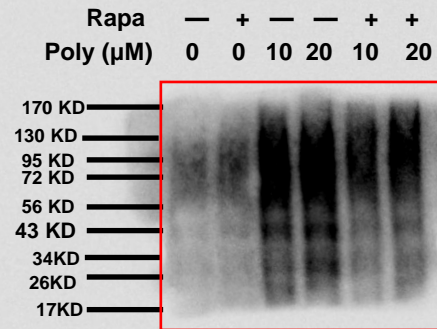

Red box is targeted  $\beta$ -actin

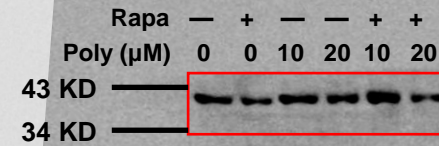

Figure 5 F

Red box is targeted Poly-ubiquitin

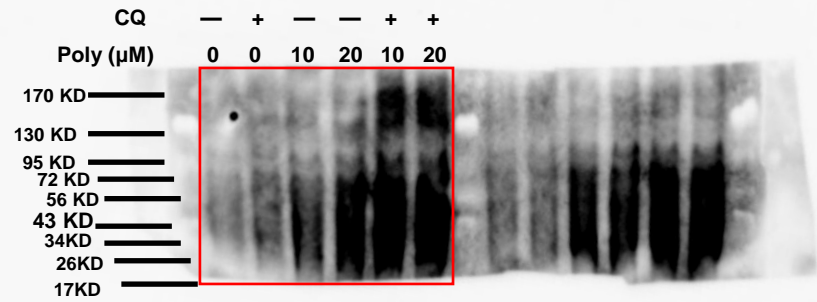

Red box is targeted  $\beta$ -actin

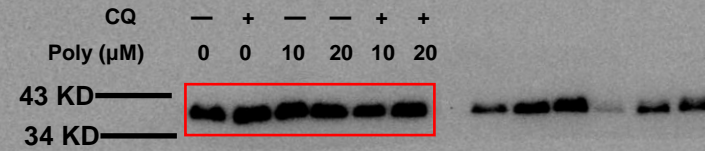



Figure 6C

Red box is targeted HMGB-1

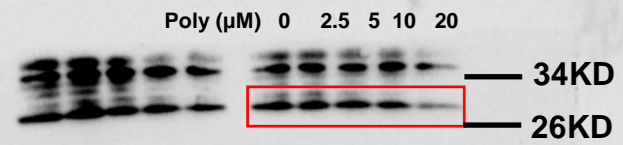

Red box is targeted β-actin

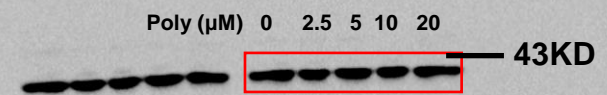

Figure 6E

Red box is targeted HSP 70

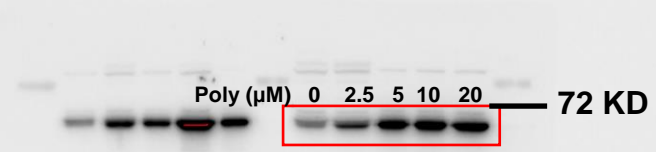

Red box is targeted β-actin

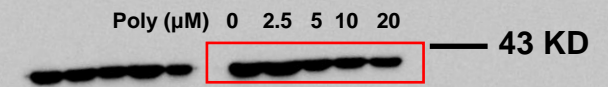

Supplement: d3bm00627a2.pdf [file d3bm00627a2.pdf]
